# Supplementary material for: Spectrophotometric Analysis of Pigments: A Critical Assessment of a High-Throughput Method for Analysis of Algal Pigment Mixtures by Spectral Deconvolution
Source: PubMed Central journal article supplement (PMC4567325; doi:10.1371/journal.pone.0137645), 2015-09-11

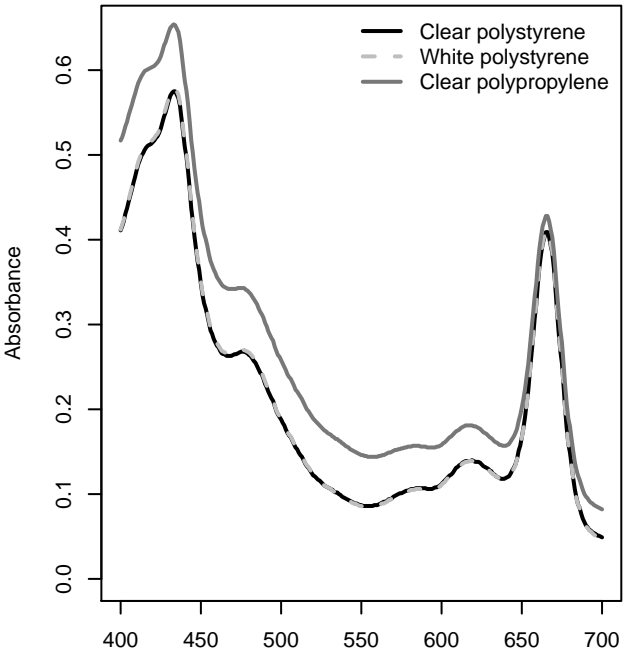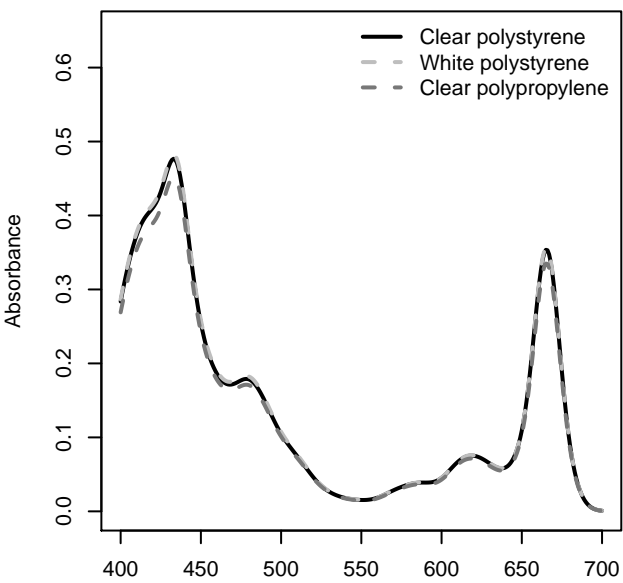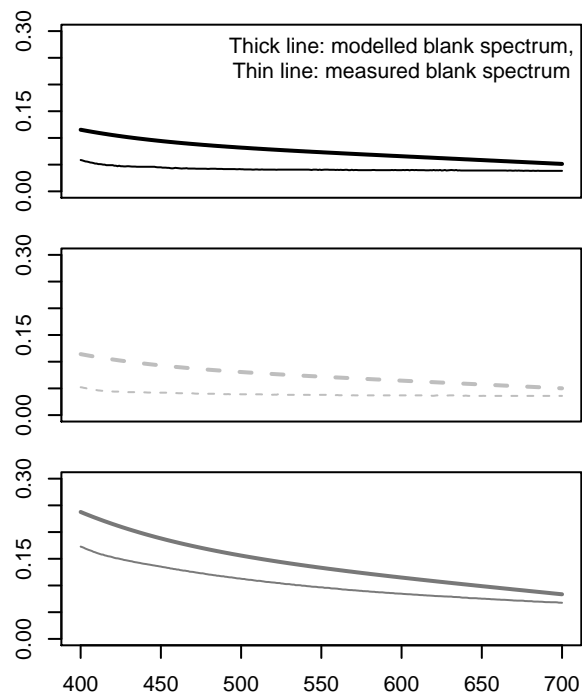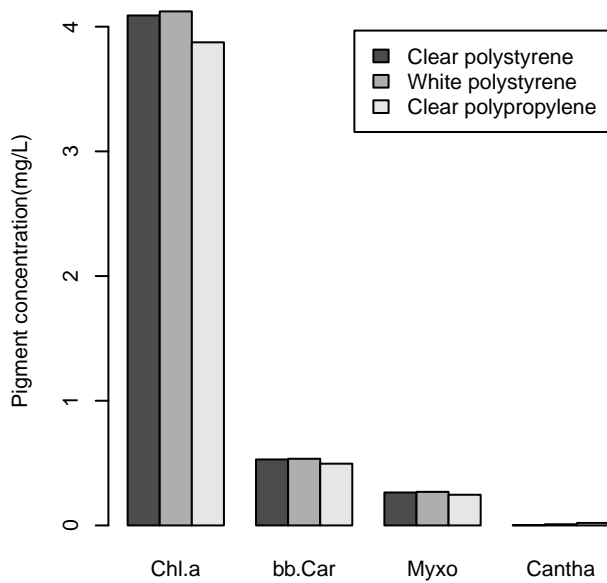

Supplement: pone.0137645.s002.pdf [file pone.0137645.s002.pdf]
